# Supplementary material for: Transcription inhibition by the depsipeptide antibiotic salinamide A
Source: eLife journal article supplement (doi:10.7554/elife.02451), 2014-04-30
Supplement: supp [file elife-02451-supp-v1.zip]

---

|                           |                                                     |
|---------------------------|-----------------------------------------------------|
| dataset                   | Eco RNAP-Sal- Br                                    |
| beamline                  | CHESS-F1                                            |
| space group               | P2 <sub>1</sub> 2 <sub>1</sub> 2 <sub>1</sub>       |
| resolution range          | 50.00-4.70 Å (4.78-4.70 Å)                          |
| cell parameters<br>(Å, °) | a=186.2, b=208.2, c=308.2<br>α=90.0, β=90.0, γ=90.0 |
| completeness              | 1.000 (1.000)                                       |
| multiplicity              | 16.6 (16.9)                                         |
| mean I/σ                  | 17.3 (3.4)                                          |
| Rmerge                    | 0.200 (0.962)                                       |

---

**Supplementary file 3. Crystal structure of *E. coli* RNAP holoenzyme in complex with a bromine-containing Sal derivative: crystallization and refinement statistics.**
