# Supplementary material for: Transcription inhibition by the depsipeptide antibiotic salinamide A
Source: eLife journal article supplement (doi:10.7554/elife.02451), 2014-04-30
Supplement: supp [file elife-02451-supp-v1.zip]

| amino acid substitution       | number of independent isolates | resistance level (MIC/MIC <sub>wild-type</sub> ) <sup>a</sup> |      | ability to complement <i>rpoC</i> <sup>ts</sup> or <i>rpoB</i> <sup>ts</sup> |
|-------------------------------|--------------------------------|---------------------------------------------------------------|------|------------------------------------------------------------------------------|
|                               |                                | SalA                                                          | SalB |                                                                              |
| <i>rpoC</i> (RNAP β' subunit) |                                |                                                               |      |                                                                              |
| 504 Gln→Pro                   | 1                              | 2                                                             | 1    | +                                                                            |
| 735 Ala→Thr                   | 1                              | 2                                                             | 2    | +                                                                            |
| 758 <sup>b</sup> Pro→Ser      | 1                              | 4                                                             | 2    | +                                                                            |
| 758 <sup>b</sup> Pro→Thr      | 1                              | 4                                                             | 2    | +                                                                            |
| 780 <sup>b</sup> Arg→Cys      | 1                              | 16                                                            | 8    | +                                                                            |
| 782 <sup>b</sup> Gly→Cys      | 1                              | 2                                                             | 2    | +                                                                            |
| <i>rpoB</i> (RNAP β subunit)  |                                |                                                               |      |                                                                              |
| 561 Ile→Ser                   | 2                              | 2                                                             | 2    | +                                                                            |
| 665 Ala→Glu                   | 1                              | 4                                                             | 4    | +                                                                            |
| 680 Leu→Met                   | 1                              | 2                                                             | 2    | +                                                                            |

<sup>a</sup> MIC<sub>wild-type, SalA</sub> = 0.049 µg/ml; MIC<sub>wild-type<sup>b</sup> SalB</sub> = 0.20 µg/ml.

<sup>b</sup> Spontaneous Sal-resistant mutants isolated at same residue (Fig 2C).

**Supplementary file 1. Plasmid-borne induced Sal-resistant mutants: sequences and properties.**
