# Supplementary material for: Transcription inhibition by the depsipeptide antibiotic salinamide A
Source: eLife journal article supplement (doi:10.7554/elife.02451), 2014-04-30
Supplement: supp [file elife-02451-supp-v1.zip]

|                           |                                                     |                                                     |
|---------------------------|-----------------------------------------------------|-----------------------------------------------------|
| dataset                   | Eco RNAP                                            | Eco RNAP-Sal                                        |
| beamline                  | CHESS-F1                                            | BNL-X25                                             |
| space group               | P2 <sub>1</sub> 2 <sub>1</sub> 2 <sub>1</sub>       | P2 <sub>1</sub> 2 <sub>1</sub> 2 <sub>1</sub>       |
| resolution range          | 50.00-3.90 Å (3.97-3.90 Å)                          | 50.00-3.90 Å (3.97-3.90 Å)                          |
| cell parameters<br>(Å, °) | a=186.4, b=207.2, c=308.3<br>α=90.0, β=90.0, γ=90.0 | a=185.8, b=208.2, c=308.2<br>α=90.0, β=90.0, γ=90.0 |
| completeness              | 0.997 (0.996)                                       | 0.998 (0.997)                                       |
| multiplicity              | 5.9 (4.8)                                           | 6.4 (4.9)                                           |
| mean I/σ                  | 13.2 (1.8)                                          | 15.5 (1.5)                                          |
| Rmerge                    | 0.115 (0.625)                                       | 0.118 (0.891)                                       |
| Rwork                     | 0.276                                               | 0.286                                               |
| Rfree                     | 0.325                                               | 0.325                                               |
| bond-length rmsd          | 0.004 Å                                             | 0.004 Å                                             |
| bond-angle rmsd           | 0.884°                                              | 1.009°                                              |
| PDB code                  | 4MEY                                                | 4MEX                                                |

**Supplementary file 2. Crystal structures of *E. coli* RNAP holoenzyme and *E. coli* RNAP holoenzyme in complex with Sal: crystallization and refinement statistics.**
